# Supplementary material for: Trauma and Violence Informed Care Through Decolonising Interagency Partnerships: A Complexity Case Study of Waminda’s Model of Systemic Decolonisation
Source: MDPI journal article supplement (doi:10.3390/ijerph17207363), 2020-10-09
Supplement: s1 [file s1]

Table 1. First Response Decolonisation Workshop Interview Guide.

|     |                                                                                                                            |
|-----|----------------------------------------------------------------------------------------------------------------------------|
| 1.  | What is the main role of your organisation?                                                                                |
| 2.  | What is your role within the organisation?                                                                                 |
| 3.  | What services relating to Aboriginal women/families do you provide?                                                        |
| 4.  | Do you/your organisation work with ACCHOs? If yes, please describe how you/your                                            |
| 5.  | organisation works with (ACCHO).                                                                                           |
| 6.  | How did you find the Decolonisation workshop?                                                                              |
| 7.  | What worked well/did not work well (in the workshop)?                                                                      |
| 8.  | What do you think could be improved/changed?                                                                               |
| 9.  | Do you think this will inspire any changes in your work/organisation/team? If so, please describe. If not, why?            |
| 10. | Has there been any other impacts? Please describe.                                                                         |
| 11. | Was it different from other types of cultural awareness training? Could you please describe how it was different/similar?  |
| 12. | Do you think this will influence the collective work of the regional strategic group? If so, please describe. If not, why? |
| 13. | What is your understanding/views on trauma informed care/culturally safe care?                                             |
| 14. | What types of training have you had in trauma-informed care/culturally safe care?                                          |
| 15. | Are there any other comments that you'd like to make?                                                                      |
